# Supplementary material
Source: Springer Nature journal article supplement (https://www.springermedizin.de/resource/supplementary/13058_2012_3596_MOESM17_ESM.pdf/9703912)

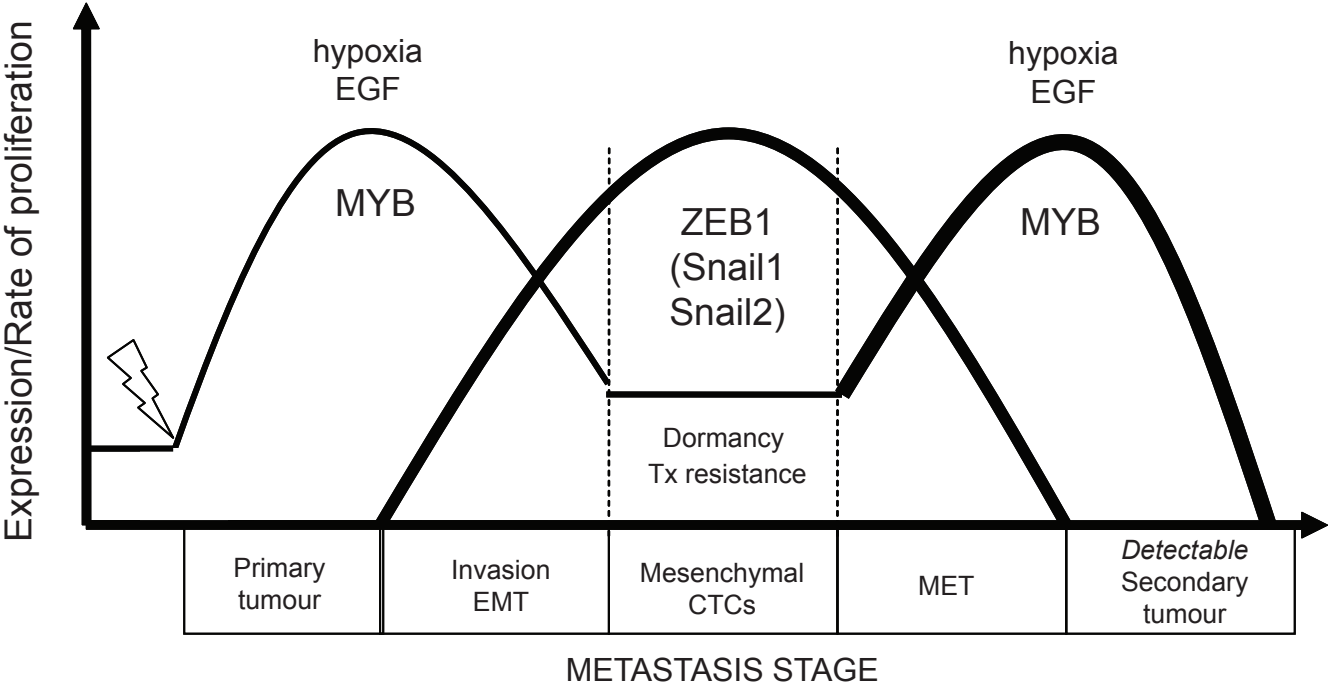

Supplement: MOESM17 [file 9703912]
